# Supplementary material for: Amanita Section Phalloideae Species in the Mediterranean Basin: Destroying Angels Reviewed
Source: MDPI journal article supplement (doi:10.3390/biology11050770), 2022-05-18
Supplement: s1 [file s1]

**Table S2: Amatoxins and phallotoxins contents in *Amanita* species (mg/g dry weight)**

|                                                                       | Collection date | $\alpha$ -Amanitin | $\beta$ -Amanitin | Phallacidin     | Phalloidin      | Phallotoxins/<br>Amatoxins |
|-----------------------------------------------------------------------|-----------------|--------------------|-------------------|-----------------|-----------------|----------------------------|
| <i>A. virosa</i> (Sweden)<br>PAM Su06-19, LIP:0402243                 | 2012            | $3.34 \pm 0.25$    | $< 0.039$         | $3.27 \pm 0.28$ | $1.35 \pm 0.10$ | 1.38                       |
| <i>A. amerivirosa</i><br>PAM19110002, LIP:0401672                     | 2019            | $< 0.039$          | $0.11 \pm 0.003$  | $< 0.039$       | $1.78 \pm 0.01$ | 15.21                      |
| <i>A. amerivirosa</i><br>PAM19110001, LIP:0401671                     | 2019            | $< 0.039$          | $0.092 \pm 0.013$ | $< 0.039$       | $2.55 \pm 0.28$ | 25.25                      |
| <i>A. verna</i> *<br>PAM01042903, LIP:0402249                         | 2001            | $0.87 \pm 0.04$    | $3.22 \pm 0.24$   | $1.63 \pm 0.08$ | $< 0.039$       | 0.40                       |
| <i>A. verna</i> Spain<br>PAM19060001, LIP:0402244                     | 2019            | $5.47 \pm 0.20$    | $10.26 \pm 0.59$  | $4.69 \pm 0.12$ | $0.64 \pm 0.03$ | 0.34                       |
| <i>A. phalloides</i> var. <i>dunensis</i><br>PAM19110516, LIP:0402239 | 2019            | $4.43 \pm 0.21$    | $4.14 \pm 0.20$   | $6.22 \pm 0.17$ | $1.56 \pm 0.04$ | 0.91                       |
| <i>A. phalloides</i><br>SMM2018-10, LIP:0402268                       | 2018            | $1.16 \pm 0.06$    | $3.90 \pm 0.13$   | $5.30 \pm 0.15$ | $0.97 \pm 0.04$ | 1.24                       |
| <i>A. vidua</i><br>PAM19050401, LIP:0401591 (a)                       | 2019            | $7.18 \pm 0.54$    | $7.55 \pm 0.69$   | $6.53 \pm 0.45$ | $1.94 \pm 0.11$ | 0.58                       |
| <i>A. vidua</i><br>PAM19050401, LIP:0401591 (b)                       | 2019            | $7.08 \pm 0.44$    | $8.50 \pm 0.57$   | $7.38 \pm 0.53$ | $1.91 \pm 0.13$ | 0.60                       |
| <i>A. vidua</i><br>PAM19050401, LIP:0401591 (c)                       | 2019            | $4.93 \pm 0.27$    | $5.02 \pm 0.23$   | $7.78 \pm 0.48$ | $1.38 \pm 0.10$ | 0.92                       |
| <i>A. vidua</i><br>PAM19050401, LIP:0401591 (average)                 | 2019            | $6.40 \pm 1.27$    | $7.02 \pm 1.80$   | $7.23 \pm 0.64$ | $1.74 \pm 0.32$ | 0.67                       |
| <i>A. vidua</i> *<br>Kizlik 83, LIP :0002253                          | 1987            | $0.27 \pm 0.01$    | $0.80 \pm 0.02$   | $7.23 \pm 0.63$ | $0.13 \pm 0.01$ | 6.88                       |

\* Probable toxin degradation with age
